# Supplementary material for: Atomically ordered Pt3Mn intermetallic electrocatalysts for the oxygen reduction reaction in fuel cells
Source: Royal Society of Chemistry journal article supplement (doi:10.1039/d2ta00127f), 2022-01-01
Supplement: d2ta00127f1.pdf [file d2ta00127f1.pdf]

## Supporting Information for

# Atomically Ordered Pt<sub>3</sub>Mn Intermetallic

# Electrocatalysts for Oxygen Reduction Reaction in

# Fuel Cells

*Jeonghoon Lim<sup>1, †, ‡</sup>, Chanwon Jung<sup>1, †, §</sup>, Doosun Hong<sup>1</sup>, Junu Bak<sup>1</sup>, Jaewook Shin<sup>1</sup>,  
MinJoong Kim<sup>1,2</sup>, DongHoon Song<sup>1</sup>, Changsoo Lee<sup>1,2</sup>, Jinkyu Lim<sup>3</sup>, Hyunjoo Lee<sup>3</sup>, Hyuck Mo  
Lee<sup>1</sup>, and EunAe Cho<sup>1,\*</sup>*

<sup>1</sup>Department of Materials Science and Engineering, Korea Advanced Institute of Science and Technology (KAIST), 291 Daehak-ro, Yuseong-gu, Daejeon, 34141, Republic of Korea

<sup>2</sup>Hydrogen Research Department, Korea Institute of Energy Research (KIER), 152 Gajeong-ro, Yuseong-gu, Daejeon, 34129, Republic of Korea

<sup>3</sup>Department of Chemical and Biomolecular Engineering, Korea Advanced Institute of Science and Technology, Daejeon 34141, South Korea.

*†J. Lim and C. Jung contributed equally to this work.*

*‡ Current address: George W. Woodruff School of Mechanical Engineering, Georgia Institute of Technology, Atlanta, Georgia 30332, United*

*States*

*§ Current address: Max-Planck-Institut für Eisenforschung GmbH, Düsseldorf 40237, Germany*

*\* Corresponding Author: eacho@kaist.ac.kr*

## Calculation of mass activity

The kinetic current ( $j_k$ ) was calculated by using the Koutecky-Levich equation,<sup>1</sup> which is expressed by

$$j_k = \frac{j_d \times j}{|j_d - j|}, \frac{1}{j} = \frac{1}{j_k} + \frac{1}{j_d} = \frac{1}{j_k} + \frac{1}{0.62nF(D_{O_2})^{2/3}v^{-1/6}C_{O_2}\omega^{1/2}}$$

where  $j$  is the measured current density,  $j_d$  is the diffusion-limited current density,  $n$  is the number of electrons transferred,  $F$  is Faraday's constant (96,485 C mol<sup>-1</sup>),  $D_{O_2}$  is the diffusion coefficient of O<sub>2</sub> in 0.1 M HClO<sub>4</sub> solution ( $1.93 \times 10^{-5}$  cm<sup>2</sup> s<sup>-1</sup>),  $v$  is the kinematic viscosity of the electrolyte ( $1.01 \times 10^{-2}$  cm<sup>2</sup> s<sup>-1</sup>),  $C_{O_2}$  is the concentration of oxygen in 0.1 M HClO<sub>4</sub> solution ( $1.26 \times 10^{-6}$  mol cm<sup>-3</sup>), and  $\omega$  is the angular rate of the rotating disk electrode.

From calculated kinetic current, mass activity was calculated using below equation.

$$\text{Mass activity} = \frac{j_k}{m_{Pt}} \text{ where } m_{Pt} \text{ is the total mass of Pt loaded on the electrode.}$$

## Calculation of electrochemically active surface area (ECSA)

ECSA was calculated by integration of the hydrogen adsorption region ( $Q_H$ ) between 0.05 and 0.4 V<sub>RHE</sub> using total mass of Pt loaded on the electrode ( $m_{Pt}$ ) and 210 μC cm<sup>-2</sup> of monolayer hydrogen adsorption charge on platinum ( $q_H$ ) as follows.<sup>2</sup>

$$ECSA = \frac{Q_H}{m_{Pt} \times q_H}$$

## Calculation of specific activity

$$\text{Specific activity} = \frac{\text{Mass activity}}{ECSA}$$

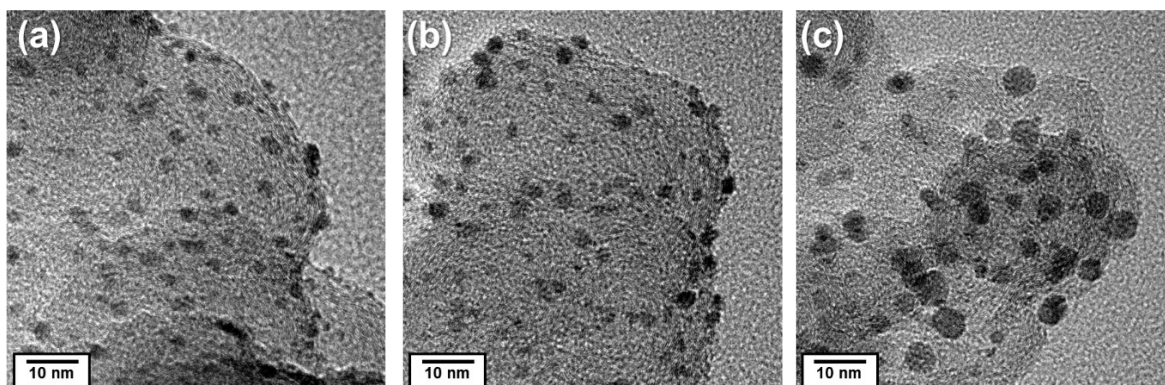

**Fig. S1.** TEM images of (a) commercial Pt/C, (b) Mn-Pt/C, and (c) Pt<sub>3</sub>Mn intermetallic/C.

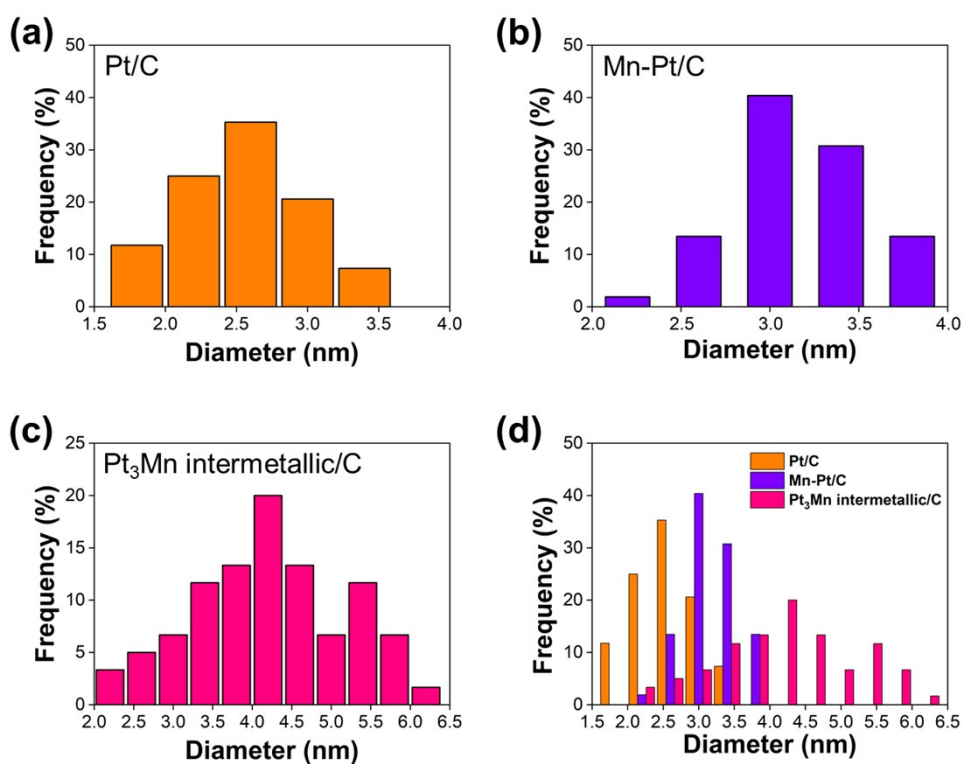

**Fig. S2.** Particle size distribution of (a) Pt/C, (b) Mn-Pt/C, and (c) Pt<sub>3</sub>Mn intermetallic/C.

Average particle sizes are 2.55, 3.16, and 4.23 nm for Pt/C, Mn-Pt/C, and Pt<sub>3</sub>Mn intermetallic/C. For comparison, particle size distributions of Pt/C, Mn-Pt/C, and Pt<sub>3</sub>Mn intermetallic/C are presented in (d).

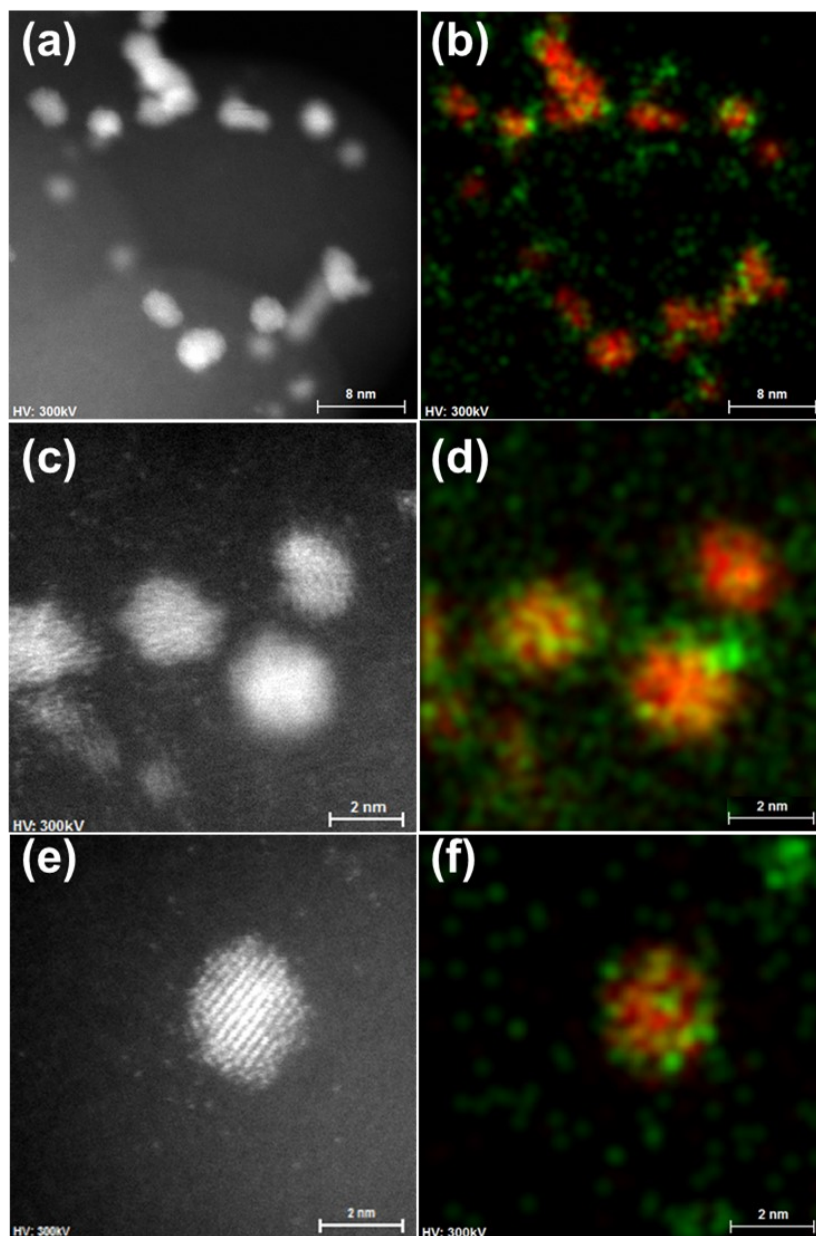

**Fig. S3.** EDS mapping images of Mn-Pt/C. Mn (green) atoms are mostly observed on Pt (red) nanoparticles.

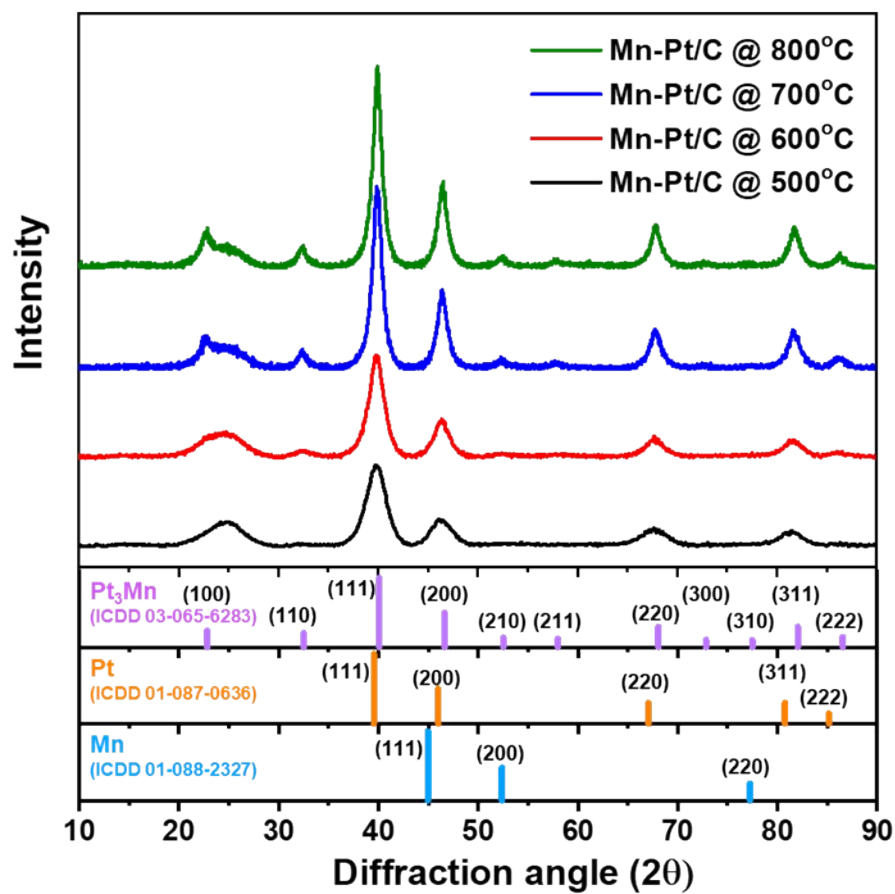

**Fig. S4.** XRD patterns of Mn-Pt/C annealed at 500, 600, 700, and 800 °C. With an increase in the annealing temperature, the XRD peaks from the Pt<sub>3</sub>Mn intermetallic phase are intensified. Pt<sub>3</sub>Mn intermetallic/C catalyst was annealed at 700 °C in this work.

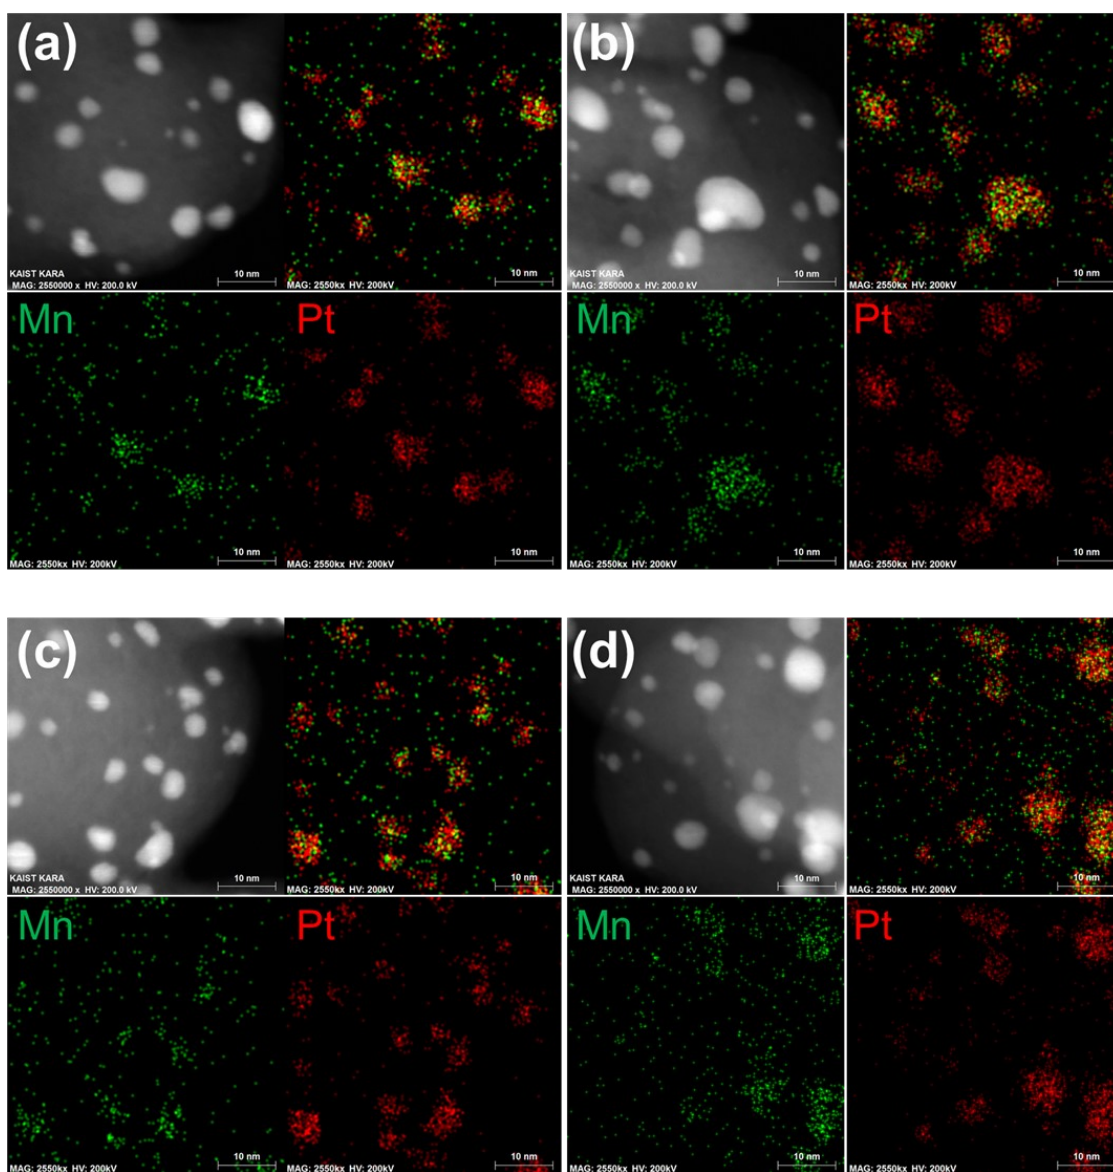

**Fig. S5.** (a-d) STEM and EDS mapping images of Pt<sub>3</sub>Mn intermetallic/C.

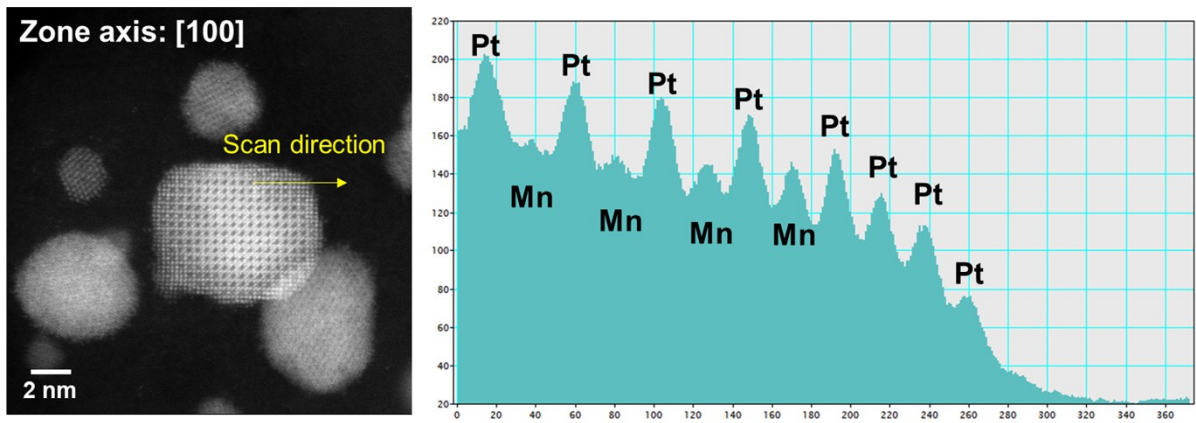

**Fig. S6.** HR-STEM images and their intensity profiles of Pt<sub>3</sub>Mn intermetallic nanoparticles with [100] zone axis.

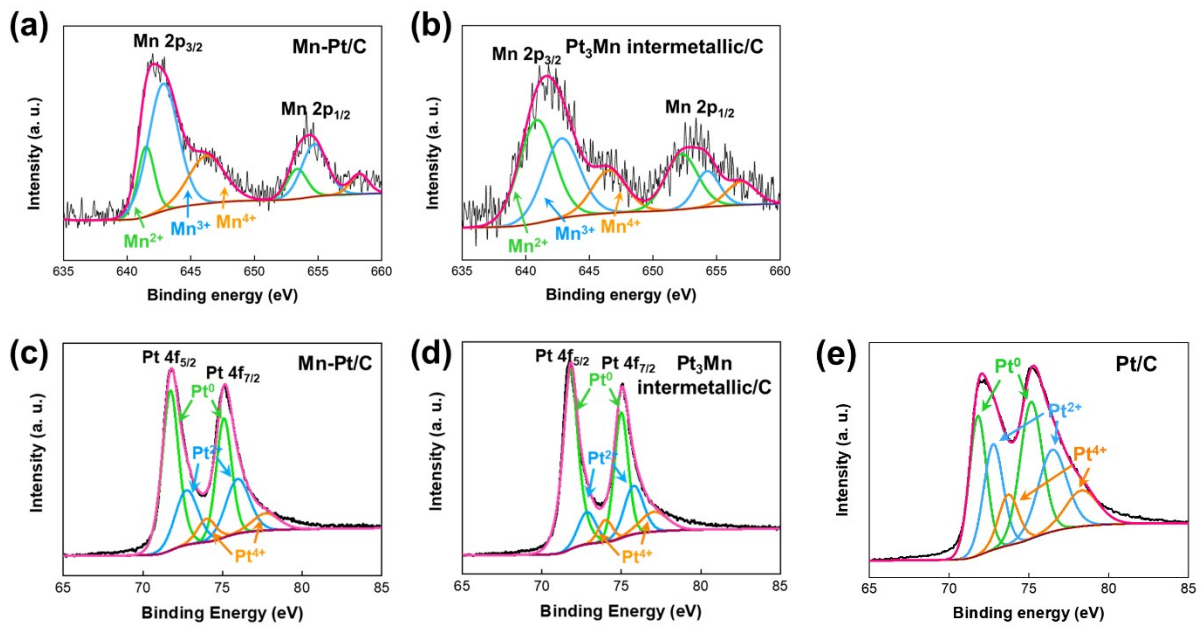

**Fig. S7.** Mn 2p XPS spectra of (a) Mn-Pt/C and (b) Pt<sub>3</sub>Mn intermetallic/C. Pt 4f XPS spectra of (c) Mn-Pt/C, (d) Pt<sub>3</sub>Mn intermetallic/C, and (e) Pt/C.



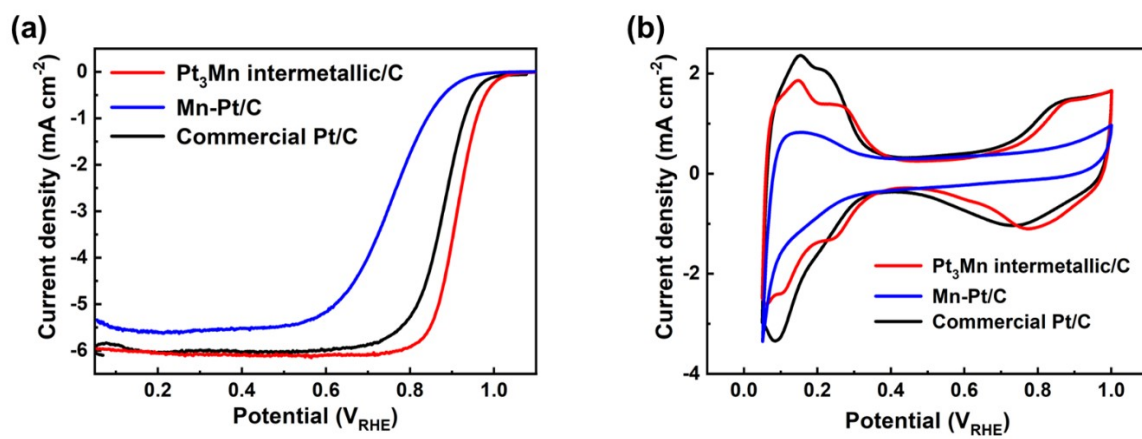

**Fig. S8.** ORR polarization and CV curves of pristine Pt<sub>3</sub>Mn intermetallic/C (700 °C), Mn-Pt/C, and commercial Pt/C catalysts.

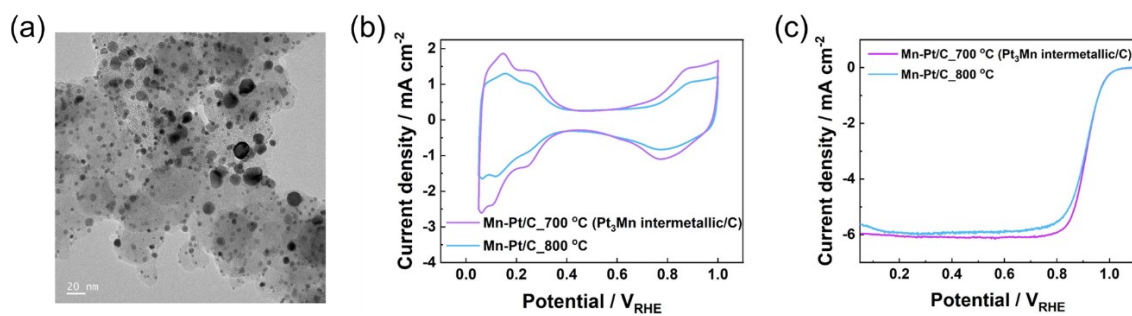

**Fig. S9.** (a) TEM image of Mn-Pt/C annealed at 800 °C under Ar/H<sub>2</sub> reductive environment for 4 hours (Mn-Pt/C\_800 °C). (b) Cyclic voltammograms and (c) ORR polarization curves of Mn-Pt/C\_800 °C and Mn-Pt/C\_700 °C (Pt<sub>3</sub>Mn intermetallic/C). The values of ECSAs, mass activity, and specific activity are summarized in **Table S3**.

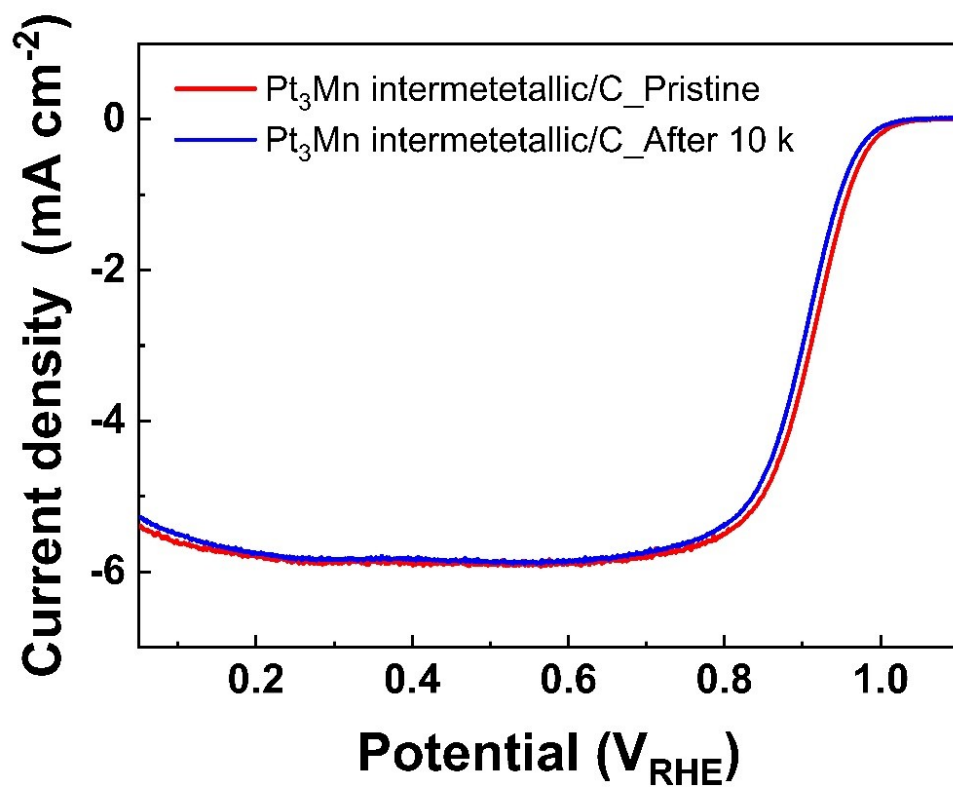

**Fig S10.** ORR polarization curves of Pt<sub>3</sub>Mn intermetallic/C and commercial Pt/C catalysts before and after 10 k ADT potential cycling test in 0.1 M HClO<sub>4</sub> solution.

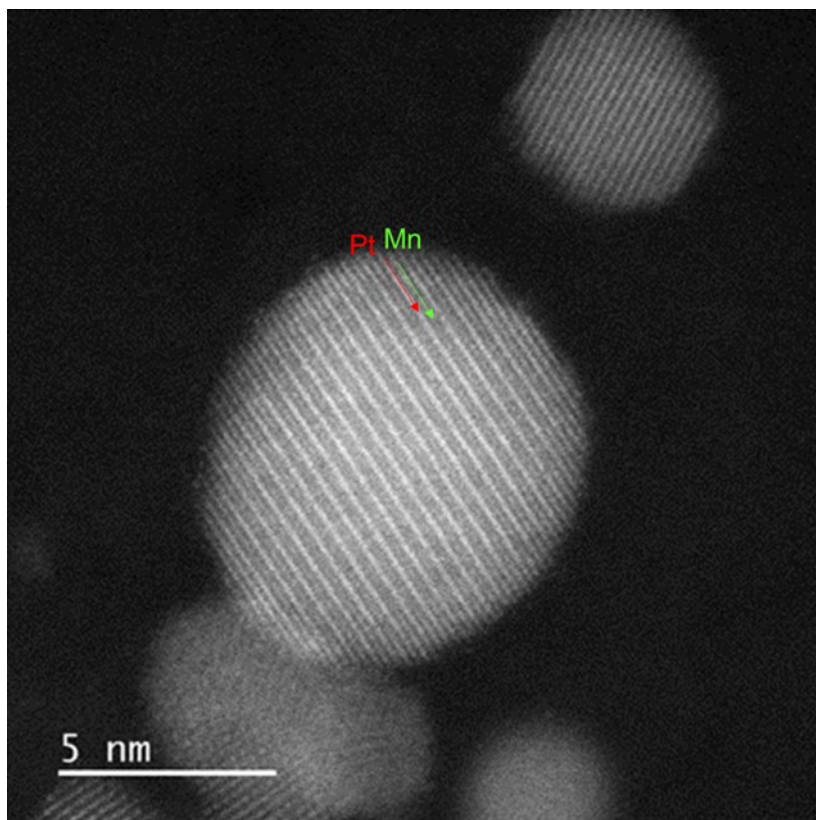

**Fig. S11.** STEM image of Pt<sub>3</sub>Mn intermetallic nanoparticle after 10k cycles.

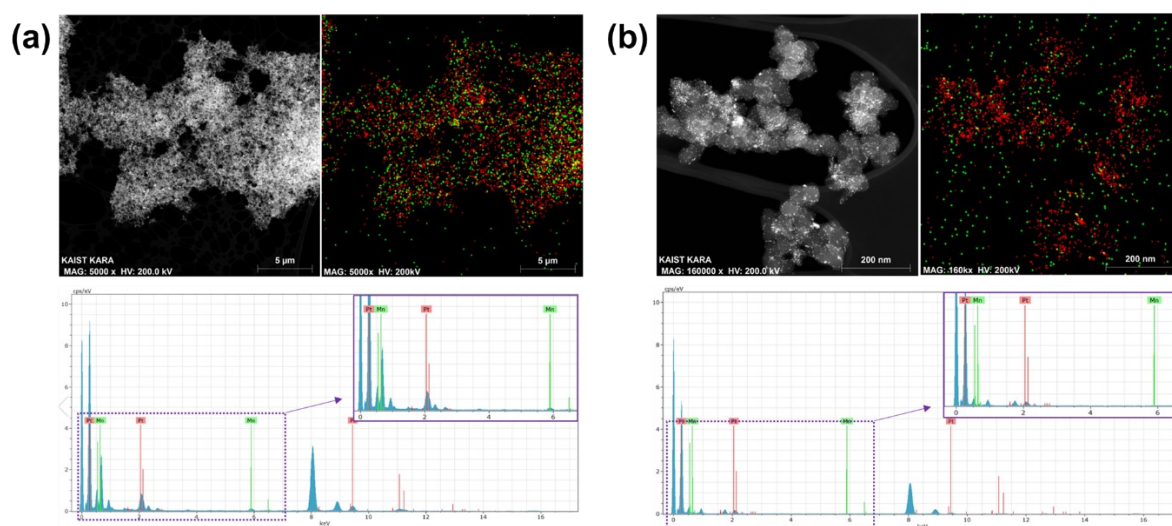

**Fig. S12.** Low magnification EDS mapping images of (a) Pt<sub>3</sub>Mn intermetallic and (b) Mn-Pt/C after 10k cycles. Corresponding chemical compositions are summarized in **Table S4**.

**Table S1.** Chemical composition of Mn-Pt/C and Pt<sub>3</sub>Mn intermetallic/C measured using ICP-OES (at%).

|                | Mn-Pt/C | Pt <sub>3</sub> Mn intermetallic/C<br>(pristine) | Pt <sub>3</sub> Mn intermetallic/C<br>(after RDE 10k cycles) |
|----------------|---------|--------------------------------------------------|--------------------------------------------------------------|
| Pt             | 75.2    | 75.1                                             | 74.7                                                         |
| Mn             | 24.8    | 24.9                                             | 25.3                                                         |
| Pt-to-Mn ratio | 3.03    | 3.02                                             | 2.95                                                         |

**Table S2.** Mass activity, ECSA, and specific activity of Pt<sub>3</sub>Mn intermetallic/C, Mn-Pt/C, and commercial Pt/C. (RDE results)

|                                    | Mass activity<br>[A mg <sub>Pt</sub> <sup>-1</sup> ] | ECSA <sub>Hupd</sub><br>[m <sup>2</sup> g <sub>Pt</sub> <sup>-1</sup> ] | Specific activity<br>[mA cm <sup>-2</sup> ] |
|------------------------------------|------------------------------------------------------|-------------------------------------------------------------------------|---------------------------------------------|
| Pt <sub>3</sub> Mn intermetallic/C | 0.386                                                | 44                                                                      | 0.877                                       |
| Mn-Pt/C                            | 0.014                                                | 30                                                                      | 0.047                                       |
| Commercial Pt/C                    | 0.125                                                | 62                                                                      | 0.202                                       |

**Table S3.** ECSA, mass activity (@ 0.9 V<sub>RHE</sub>) and specific activity (0.9 V<sub>RHE</sub>) of Mn-Pt/C annealed at 700 °C (Pt<sub>3</sub>Mn intermetallic/C) and Mn-Pt/C annealed at 800 °C catalysts. (RDE results)

|                | ECSA <sub>Hupd</sub><br>[m <sup>2</sup> g <sub>Pt</sub> <sup>-1</sup> ] | Mass activity<br>[A mg <sub>Pt</sub> <sup>-1</sup> ] | Specific activity<br>[mA cm <sup>-2</sup> ] |
|----------------|-------------------------------------------------------------------------|------------------------------------------------------|---------------------------------------------|
| Mn-Pt/C_700 °C | 44                                                                      | 0.386                                                | 0.877                                       |
| Mn-Pt/C_800 °C | 38.94                                                                   | 0.312                                                | 0.801                                       |

**Table S4.** Chemical composition changes of Pt<sub>3</sub>Mn intermetallic/C and Mn-Pt/C after 10k cycles.

| Catalyst after 10k cycles<br>(RDE) | wt%  |       | at%   |       |
|------------------------------------|------|-------|-------|-------|
|                                    | Mn   | Pt    | Mn    | Pt    |
| Pt <sub>3</sub> Mn intermetallic/C | 7.62 | 92.38 | 22.65 | 77.35 |
| Mn-Pt/C                            | 0.81 | 99.19 | 2.83  | 97.17 |

**Table S5.** Concentrations of Pt and Mn in the electrolytes dissolved from Pt<sub>3</sub>Mn intermetallic/C and Mn-Pt/C during 10k potential cycles. (ICP-MS, unit: ppb =  $\mu\text{g/L}$ ).

|                                    | Mn      | Pt    |
|------------------------------------|---------|-------|
| Blank                              | 0.048   | 0.015 |
| Pt <sub>3</sub> Mn intermetallic/C | 38.757  | 0.650 |
| Mn-Pt/C                            | 205.477 | 4.213 |

**Table S6.** Numbers of Pt atoms and Mn atoms in each sublayer of the slabs.

| Layer          | Slab (1) |    | Slab (2) |    | Slab (3) |    | Slab (4) |    |   |
|----------------|----------|----|----------|----|----------|----|----------|----|---|
|                | Pt       | Mn | Pt       | Mn | Pt       | Mn | Pt       | Mn |   |
| <b>Pt-skin</b> | 4        | 0  | 4        | 0  | 4        | 0  | 4        | 0  |   |
| 1st            | 4        | 0  | 3        | 1  | 2        | 2  | 1        | 3  |   |
| <b>Sub-</b>    | 2nd      | 2  | 2        | 3  | 1        | 4  | 0        | 4  | 0 |
| <b>surface</b> | 3rd      | 3  | 1        | 3  | 1        | 3  | 1        | 4  | 0 |
|                | 4-5th    | 3  | 1        | 3  | 1        | 3  | 1        | 3  | 1 |

**Table S7.** Single-cell performance of representative Pt-based intermetallic ORR catalysts.

| Catalyst                                    | Operating Condition                        |                            | Loading<br>C/A<br>(mg <sub>Pt</sub> cm <sup>-2</sup> ) | Voltage<br>(V) | Current<br>Density (mA<br>cm <sup>-2</sup> ) | Power Density<br>(W cm <sup>-2</sup> ) | Ref.                 |
|---------------------------------------------|--------------------------------------------|----------------------------|--------------------------------------------------------|----------------|----------------------------------------------|----------------------------------------|----------------------|
|                                             | Gas                                        | Back pressure              |                                                        |                |                                              |                                        |                      |
| <b>Pt<sub>3</sub>Mn<br/>intermetallic/C</b> | <b>H<sub>2</sub>-Air<br/>(1.5:2.0)</b>     | <b>No<br/>backpressure</b> | <b>0.15 / 0.15</b>                                     | <b>0.7</b>     | <b>550</b>                                   | <b>0.38</b>                            | <b>This<br/>work</b> |
| <b>fcc-PtFe/C</b>                           | H <sub>2</sub> -Air<br>(1.5:8.0)           | No<br>backpressure         | 0.2 / 0.2                                              | 0.7            | ~300                                         | ~0.21                                  | 3                    |
| <b>MOF-derived<br/>Pt<sub>3</sub>Co</b>     | H <sub>2</sub> -Air                        | 1.5 bar <sub>abs</sub>     | 0.13 / N/A                                             | 0.8            | 270                                          | 0.22                                   | 4                    |
| <b>L1<sub>0</sub>-CoPt/Pt</b>               | H <sub>2</sub> -Air<br>(500/100<br>0 sccm) | 1.5 bar <sub>abs</sub>     | 0.105 / N/A                                            | 0.7            | ~700                                         | 0.49                                   | 5                    |



## Computational Details

We performed DFT calculations using the Vienna Ab initio Simulation Package (VASP), in which a plane-wave basis set is employed.<sup>6-9</sup> The kinetic energy cutoff was set to 500 eV to expand the plane wave. The generalized gradient approximation (GGA) was used to describe the exchange-correlational interactions with the Perdew-Burke-Ernzerhof (PBE) functional.<sup>10</sup> The projector-augmented wave method was used to treat core and valence electrons.<sup>11</sup> To describe the oxygen reduction reaction on the intermetallic Pt<sub>3</sub>Mn and Pt, we modeled the (111) surfaces of periodically repeated 2×2 supercells with 6 atomic layers and a vacuum width of 15 Å. Pt<sub>3</sub>Mn (111) was modeled by a so-called Pt-skin structure, where the outermost layer of 6 atomic layers was composed of only platinum atoms and the two bottom-most layers were fixed for both Pt<sub>3</sub>Mn and Pt. The Brillouin zone was sampled with a 4 × 4 × 1 Monkhorst–Pack k-point mesh. The geometries were optimized until the Hellmann-Feynman forces were less than 10<sup>-2</sup> eV/Å, and the electronic structures were relaxed with a convergence criterion of 10<sup>-5</sup> eV. An implicit solvation model was implemented to describe the solvent effect by using VASPsol.<sup>12</sup>

In this study, the free energy changes of each step were calculated based on a computational hydrogen electrode model reported by Nørskov et al.<sup>13</sup> Adding entropy term (TΔS) and zero-point energy (ZPE) corrections to the DFT-calculated energies, we could obtain the Gibbs free energy diagram as follows:

$$\Delta G = \Delta E_{\text{DFT}} + \Delta \text{ZPE} - T\Delta S - neU,$$

where  $\Delta E_{\text{DFT}}$  is the change in the total energy calculated by DFT method;  $\Delta \text{ZPE}$  is the difference in zero-point energy;  $\Delta S$  is the change in entropy; T is temperature, which was set

to the room temperature (298.15K);  $n$  is the number of electrons involved in each ORR reaction step; and  $U$  is the electrode potential.

The dissolution potential of Pt atoms was calculated as

$$U_{dissolution} = U_{dissolution}^{Bulk Pt} + \frac{1}{2n_{dissolved}} \{E(Pt_{n-n_{dissolved}}M_m) + n_{dissolved}E(Pt_{bulk}) - E(Pt_nM_m)\},$$

where  $U_{dissolution}$  and  $U_{dissolution}^{Bulk Pt}$  are the dissolution potentials of a surface and bulk Pt into  $Pt^{2+}$ .

Here, we calculated  $U_{dissolution}^{Bulk Pt}$  as 1.188 V, and  $n_{dissolved}$  is defined as the number of Pt atoms dissolved.

## REFERENCES

- 1 G. Zhang, C. Li, J. Liu, L. Zhou, R. Liu, X. Han, H. Huang, H. Hu, Y. Liu and Z. Kang, *J. Mater. Chem. A*, 2014, **2**, 8184–8189.
- 2 C. Yao, F. Li, X. Li and D. Xia, *J. Mater. Chem.*, 2012, **22**, 16560–16565.
- 3 D. Y. Chung, S. W. Jun, G. Yoon, S. G. Kwon, D. Y. Shin, P. Seo, J. M. Yoo, H. Shin, Y.-H. Chung, H. Kim, B. S. Mun, K.-S. Lee, N.-S. Lee, S. J. Yoo, D.-H. Lim, K. Kang, Y.-E. Sung and T. Hyeon, *J. Am. Chem. Soc.*, 2015, **137**, 15478–15485.
- 4 X. X. Wang, S. Hwang, Y.-T. Pan, K. Chen, Y. He, S. Karakalos, H. Zhang, J. S. Spendelow, D. Su and G. Wu, *Nano Lett.*, 2018, **18**, 4163–4171.
- 5 J. Li, S. Sharma, X. Liu, Y.-T. Pan, J. S. Spendelow, M. Chi, Y. Jia, P. Zhang, D. A. Cullen and Z. Xi, *Joule*, 2019, **3**, 124–135.
- 6 G. Kresse and J. Furthmüller, *Phys. Rev. B*, 1996, **54**, 11169.
- 7 G. Kern, G. Kresse and J. Hafner, *Phys. Rev. B*, 1999, **59**, 8551.
- 8 G. Kresse and J. Furthmüller, *Comput. Mater. Sci.*, 1996, **6**, 15–50.
- 9 G. Kresse and J. Hafner, *Phys. Rev. B*, 1993, **48**, 13115–13118.
- 10 J. P. Perdew, K. Burke and M. Ernzerhof, *Phys. Rev. Lett.*, 1996, **77**, 3865–3868.
- 11 P. E. Blöchl, *Phys. Rev. B*, 1994, **50**, 17953–17979.
- 12 K. Mathew, R. Sundararaman, K. Letchworth-Weaver, T. A. Arias and R. G. Hennig, *J. Chem. Phys.*, 2014, **140**, 84106.
- 13 J. K. Nørskov, J. Rossmeisl, A. Logadottir, L. Lindqvist, J. R. Kitchin, T. Bligaard and H. Jonsson, *J. Phys. Chem. B*, 2004, **108**, 17886–17892.
